# Supplementary material for: Axial contraction and short-range compaction of chromatin synergistically promote mitotic chromosome condensation
Source: eLife journal article supplement (doi:10.7554/elife.10396), 2015-11-28
Supplement: supp [file elife-10396-supp-v1.zip]

Archive with 2 entries (2 files):
- elife_poa_e10396_Figure_4_figure_supplement_1.pdf
- elife_poa_e10396_Figure_6_figure_supplement_1.pdf
