# Supplementary figures and images for: Axial contraction and short-range compaction of chromatin synergistically promote mitotic chromosome condensation
Source: eLife journal article supplement (doi:10.7554/elife.10396), 2015-11-28

Figure 4 - figure supplement 1

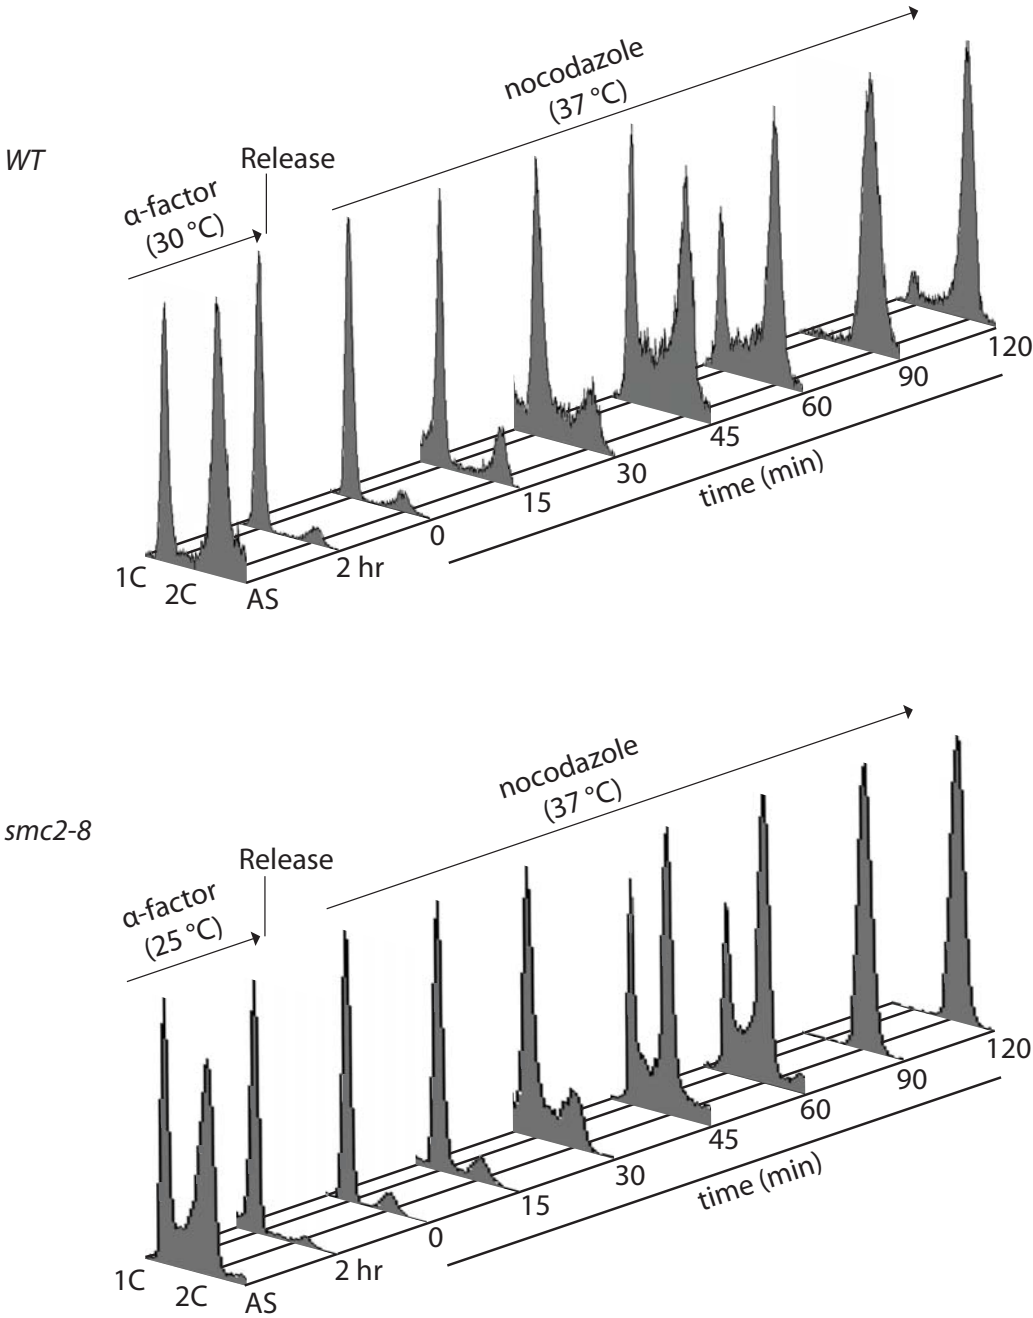

Supplement: supp [file elife-10396-supp-v1.zip › elife_poa_e10396_Figure_4_figure_supplement_1.pdf]

Figure 6 - figure supplement 1

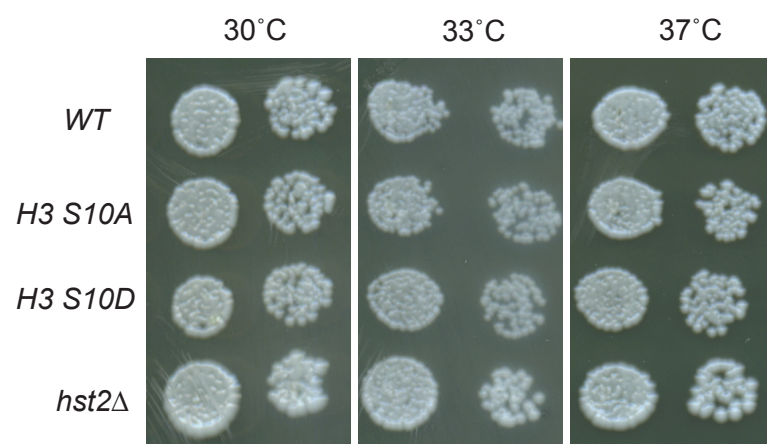

Supplement: supp [file elife-10396-supp-v1.zip › elife_poa_e10396_Figure_6_figure_supplement_1.pdf]
